# Supplementary material for: The yhiM gene codes for an inner membrane protein involved in GABA export in Escherichia coli
Source: PubMed Central journal article supplement (PMC6604978; doi:10.3934/microbiol.2017.1.71), 2017-02-17
Supplement: microbiol-03-01-071-s001.pdf [file microbiol-03-01-071-s001.pdf]

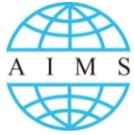

*Research article*

**The *yhiM* gene codes for an inner membrane protein involved in GABA export in *Escherichia coli***

**Angela Tramonti<sup>1</sup>, Fiorenzo De Santis<sup>2</sup>, Eugenia Pennacchietti<sup>2</sup> and Daniela De Biase<sup>2,\*</sup>**

<sup>1</sup> Institute of Molecular Biology and Pathology, CNR, Department of Biochemical Sciences “A. Rossi Fanelli”, Sapienza University of Rome, Piazzale Aldo Moro 5, 00185 Roma, Italy

<sup>2</sup> Department of medico-surgical Sciences and Biotechnologies, Sapienza University of Rome, Laboratory affiliated to Istituto Pasteur Italia-Fondazione Cenci Bolognetti, Corso della Repubblica 79, 04100 Latina, Italy

\* **Correspondence:** Email: [daniela.debiase@uniroma1.it](mailto:daniela.debiase@uniroma1.it); Tel: +39-0773-1757230;  
Fax: +39-0773-1757254.

---
